# Supplementary material
Source: PubMed Central journal article supplement (PMC7447508)
Supplement: NIHMS1609950-supplement-Table_of_Materials.pdf [file NIHMS1609950-supplement-Table_of_Materials.pdf]

Materials List for:

# A Step-by-Step Implementation of DeepBehavior, Deep Learning Toolbox for Automated Behavior Analysis

Sanjay Shukla<sup>1</sup>, Ahmet Arac<sup>1</sup>

<sup>1</sup>Department of Neurology, David Geffen School of Medicine, University of California, Los Angeles

Correspondence to: Ahmet Arac at [aarac@mednet.ucla.edu](mailto:aarac@mednet.ucla.edu)

URL: <https://www.jove.com/video/60763>

DOI: [doi:10.3791/60763](https://doi.org/10.3791/60763)

## Materials

| Name          | Company   | Catalog Number | Comments         |
|---------------|-----------|----------------|------------------|
| CUDA v8.0.61  | NVIDIA    | n/a            | GPU Software     |
| MATLAB R2016b | Mathworks | n/a            | Matlab           |
| Python 2.7    | Python    | n/a            | Python Version   |
| Quadro P6000  | NVIDIA    | n/a            | GPU Processor    |
| Ubuntu v16.04 | Ubuntu    | n/a            | Operating System |
